# Supplementary material for: Impact of alkyl chain length and water on the structure and properties of 1-alkyl-3-methylimidazolium chloride ionic liquids
Source: Royal Society of Chemistry journal article supplement (doi:10.1039/d0cp01686a), 2020-01-01
Supplement: d0cp01686a1.pdf [file d0cp01686a1.pdf]

## **Supporting Information**

### **Impact of Alkyl Chain Length and Water on the Structure and Properties of 1-alkyl-3-methylimidazolium Chloride Ionic Liquids**

**Paridhi Sanchora<sup>†</sup>, Deepak K. Pandey<sup>†</sup>, Hardik L. Kagdada<sup>†</sup>, Arnulf Materny<sup>§</sup> and Dheeraj K. Singh<sup>†\*</sup>**

*<sup>†</sup>Department of Physics, Institute of Infrastructure Technology Research and Management, Ahmedabad, 380026, India*

*<sup>§</sup>Department of Physics and Earth Sciences, Jacobs University Bremen, Bremen, 28759, Germany*

\*Corresponding author: dheerajsingh84@gmail.com

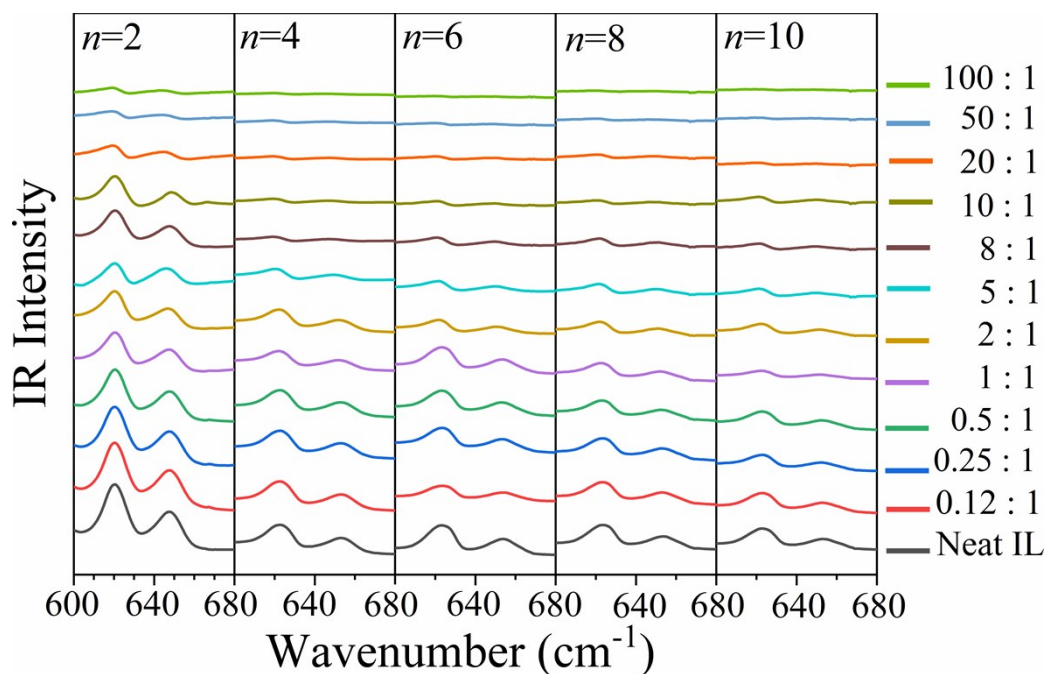

**Fig. S1** ATR-IR absorption spectra of neat  $C_n$ mim Cl ( $n = 2, 4, 6, 8, 10$ ) ion pairs and their binary mixtures with  $H_2O$  in the region of  $600\text{-}680\text{ cm}^{-1}$  at various  $H_2O : \text{IL}$  molar ratios. The lines at  $623$  and  $654\text{ cm}^{-1}$  are assigned to ring stretching vibration and alkyl chain  $N\text{-CH}_2\text{-CH}_3$  asymmetric bending, respectively.

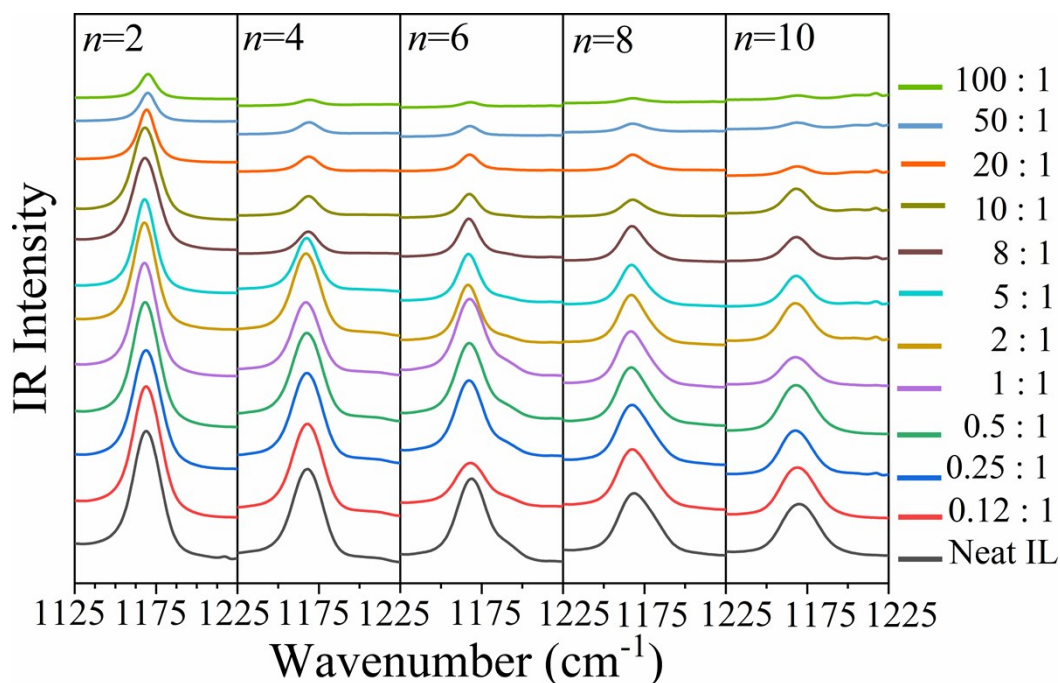

**Fig. S2** ATR-IR absorption spectra of neat  $C_n$ mim Cl ( $n = 2, 4, 6, 8, 10$ ) ion pairs and their binary mixtures with  $H_2O$  in the region of  $1125\text{-}1225\text{ cm}^{-1}$  at various  $H_2O : \text{IL}$  molar ratios. The line at  $1167\text{ cm}^{-1}$  is assigned to the  $C\text{-C}$  stretching vibration of the ring.

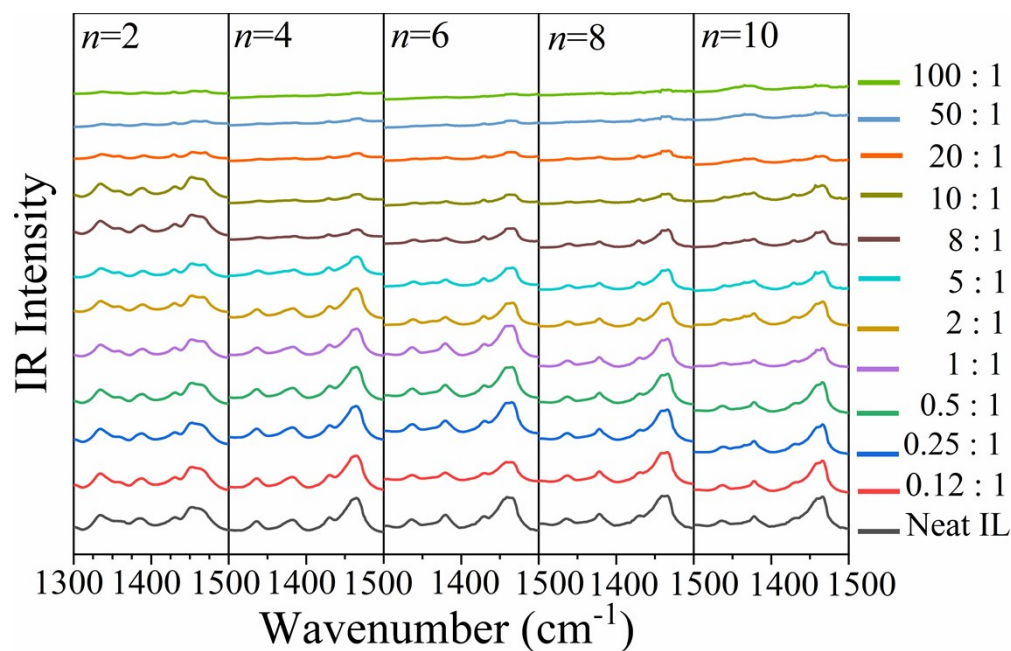

**Fig. S3** ATR-IR absorption spectra of neat  $C_n$ mim Cl ( $n = 2, 4, 6, 8, 10$ ) ion pairs and their binary mixtures with  $H_2O$  in the region of  $1300-1500\text{ cm}^{-1}$  at various  $H_2O : \text{IL}$  molar ratios. The line at  $1325\text{ cm}^{-1}$  assigned to the ring C-H in plane bending. The line at  $1378\text{ cm}^{-1}$  belongs to the alkyl chain ( $\text{CH}_2$ ) stretching. The peaks at  $1453$  and  $1470\text{ cm}^{-1}$  are assigned to the asymmetric ring stretching and asymmetric bending vibrations of C8-H, respectively.

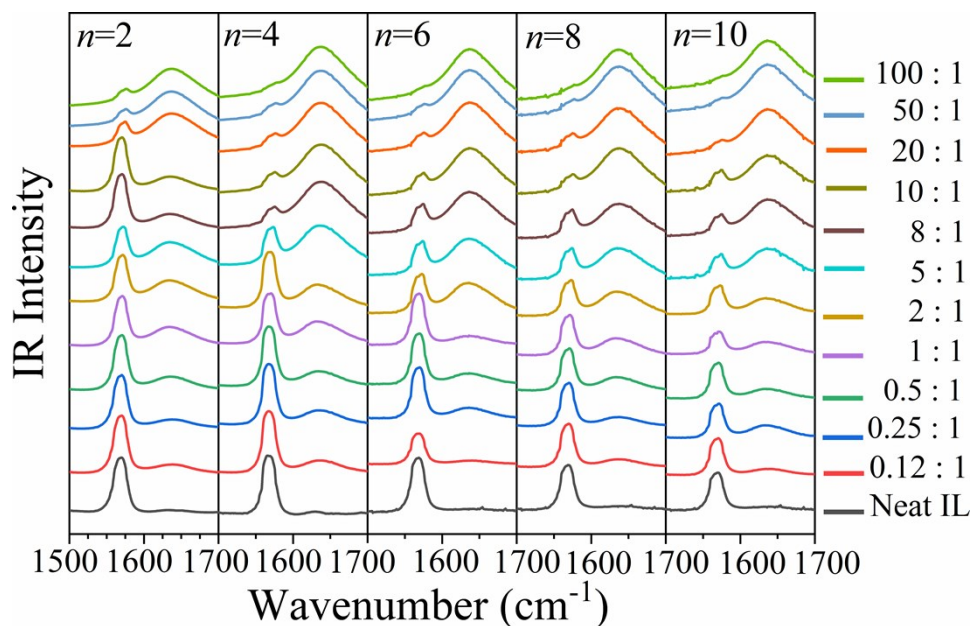

**Fig. S4** ATR-IR absorption spectra of neat  $C_n$ mim Cl ( $n = 2, 4, 6, 8, 10$ ) ion pairs and their binary mixtures with  $H_2O$  in the region of  $1500-1700\text{ cm}^{-1}$  at various  $H_2O : \text{IL}$  molar ratios. The line at  $1569\text{ cm}^{-1}$  is assigned to the  $\text{C}8\text{H}_2\text{-C}9\text{H}_2\text{-C}10\text{H}_2$  scissoring vibration. A new peak arises at  $1576\text{ cm}^{-1}$ .

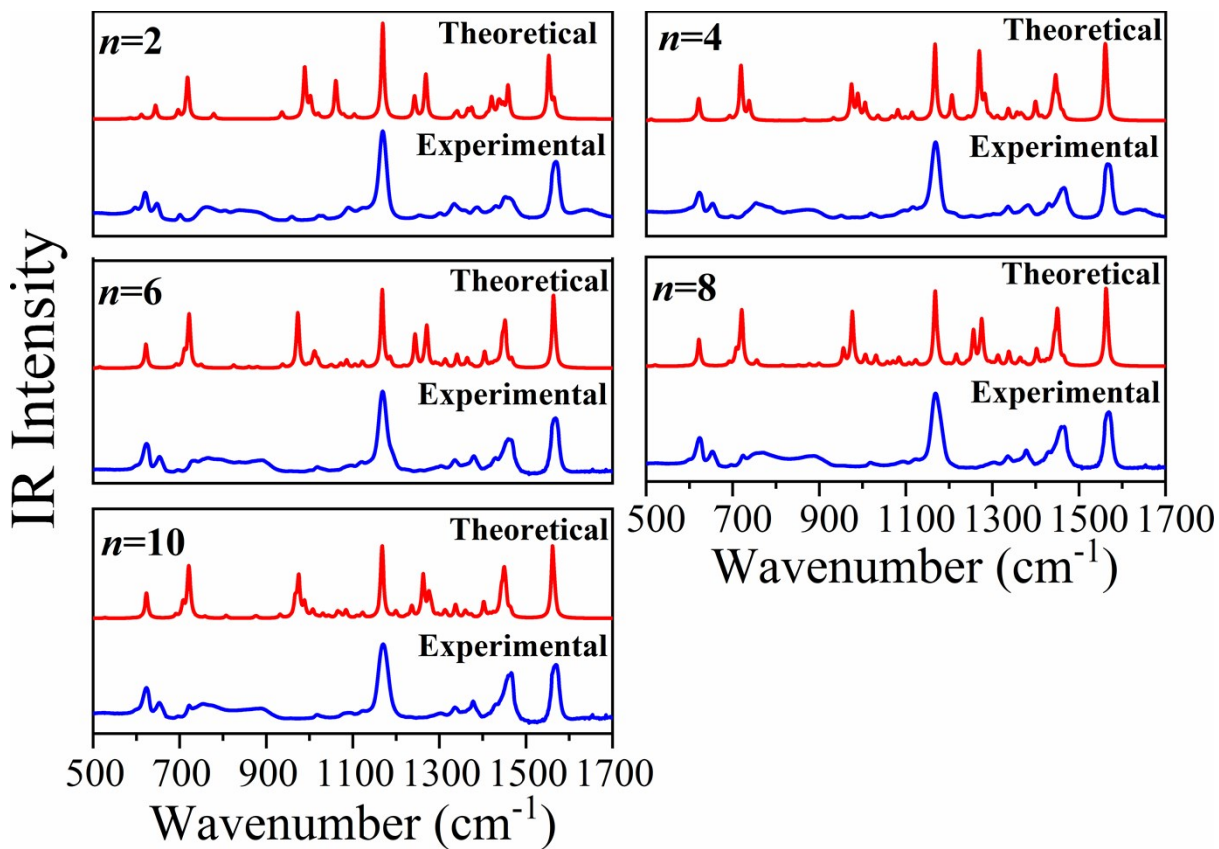

**Fig. S5** Comparison of experimental and theoretical IR absorption spectra of the most stable geometries for the  $\text{C}_n\text{mim Cl}$  ( $n = 2, 4, 6, 8, 10$ ) ion-pairs in the range of 500-1700  $\text{cm}^{-1}$ .

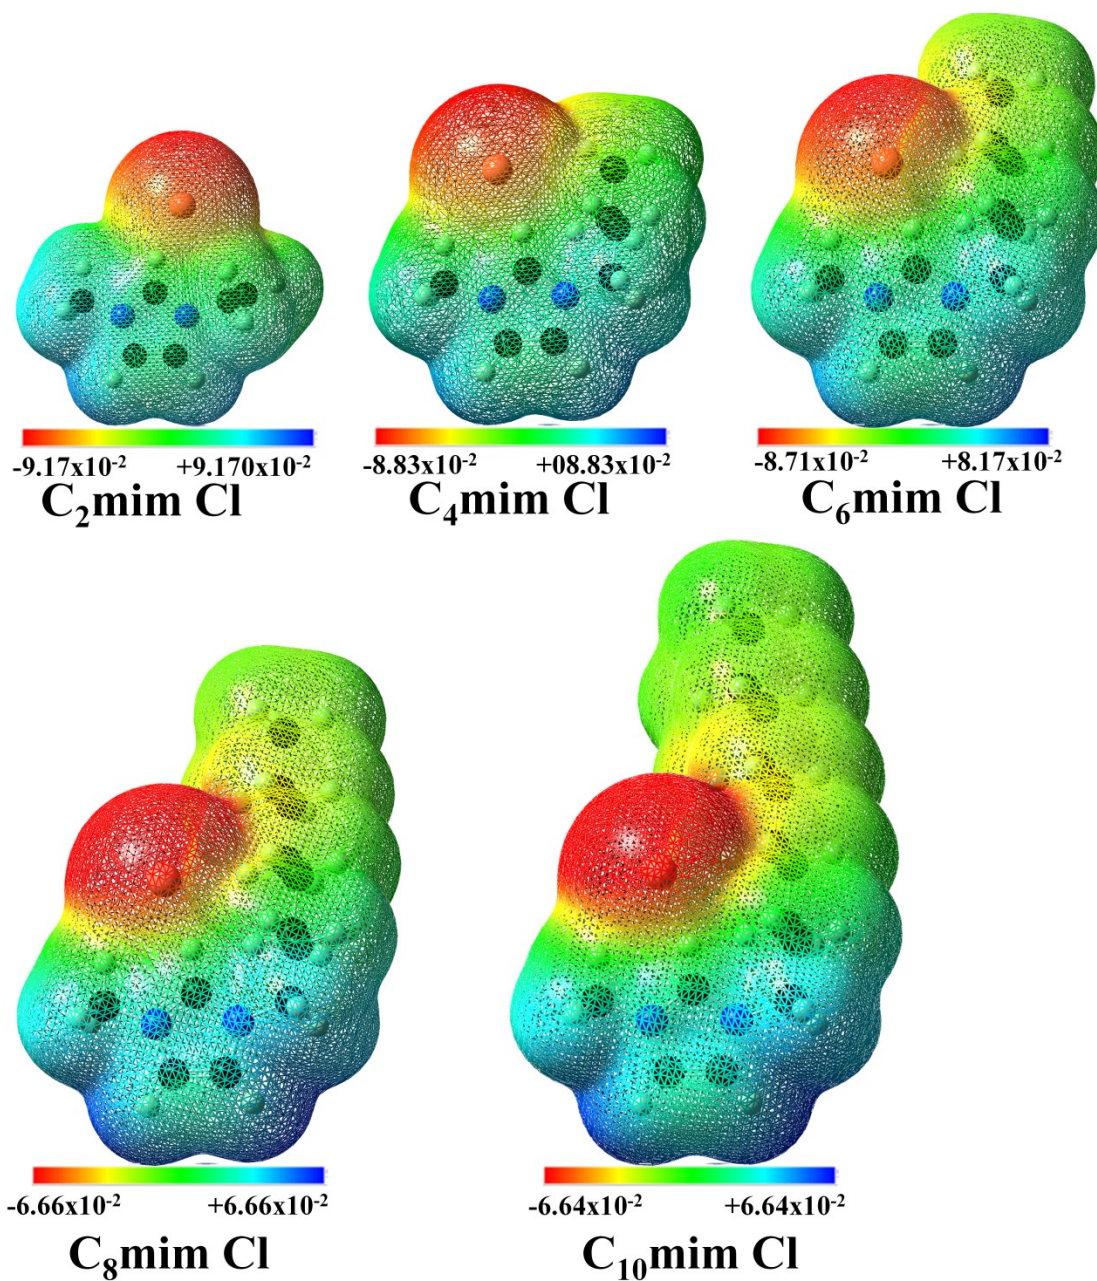

**Fig. S6** Electrostatic potential mapping (ESP) from total self-consistent field (SCF) for  $C_n$  mim Cl ( $n = 2, 4, 6, 8, 10$ ) ion-pairs.

**Table S1.** Bond lengths and dihedral angles of the optimized geometries of the  $C_n$ mim Cl ( $n = 2, 4, 6, 8, 10$ ) ion-pairs obtained from the DFT calculations.

|                             | $C_2$ mim Cl | $C_4$ mim Cl  | $C_6$ mim Cl  | $C_8$ mim Cl  | $C_{10}$ mim Cl |
|-----------------------------|--------------|---------------|---------------|---------------|-----------------|
| <b>Bond Length (Å)</b>      |              |               |               |               |                 |
| N1-C2                       | 1.33         | 1.33          | 1.33          | 1.33          | 1.33            |
| C2-N3                       | 1.33         | 1.33          | 1.33          | 1.33          | 1.33            |
| N3-C4                       | 1.37         | 1.37          | 1.37          | 1.37          | 1.37            |
| C4-C5                       | 1.35         | 1.35          | 1.35          | 1.35          | 1.35            |
| C5-N1                       | 1.38         | 1.37          | 1.37          | 1.37          | 1.37            |
| <b>C2-H9</b>                | <b>1.12</b>  | <b>1.12</b>   | <b>1.11</b>   | <b>1.11</b>   | <b>1.11</b>     |
| C5-H11                      | 1.07         | 1.07          | 1.07          | 1.07          | 1.07            |
| C4-H10                      | 1.07         | 1.07          | 1.07          | 1.07          | 1.07            |
| N1-C6                       | 1.45         | 1.46          | 1.46          | 1.46          | 1.46            |
| N3-C7                       | 1.47         | 1.47          | 1.47          | 1.47          | 1.47            |
| C6-H12                      | 1.09         | 1.09          | 1.09          | 1.09          | 1.09            |
| C6-H13                      | 1.09         | 1.09          | 1.09          | 1.09          | 1.09            |
| C6-H14                      | 1.08         | 1.08          | 1.08          | 1.09          | 1.09            |
| C7-H15                      | 1.09         | 1.09          | 1.09          | 1.09          | 1.09            |
| C7-H16                      | 1.09         | 1.09          | 1.09          | 1.09          | 1.09            |
| C8-H17                      | 1.09         | 1.09          | 1.09          | 1.09          | 1.09            |
| C8-H18                      | 1.09         | 1.09          | 1.09          | 1.09          | 1.09            |
| C9-H19                      | 1.09         | 1.09          | 1.09          | 1.09          | 1.09            |
| C9-H20                      |              | 1.09          | 1.09          | 1.09          | 1.09            |
| C10-H21                     |              | 1.09          | 1.09          | 1.09          | 1.09            |
| C10-H22                     |              | 1.09          | 1.09          | 1.09          | 1.09            |
| C10-H23                     |              | 1.09          | 1.09          | 1.09          | 1.09            |
| C11-H24                     |              |               | 1.09          | 1.09          | 1.09            |
| C12-H25                     |              |               | 1.09          | 1.09          | 1.09            |
| C12-H26                     |              |               | 1.09          | 1.09          | 1.09            |
| C13-H27                     |              |               |               | 1.09          | 1.09            |
| C13-H28                     |              |               |               | 1.09          | 1.09            |
| C14-H29                     |              |               |               | 1.09          | 1.09            |
| C14-H30                     |              |               |               | 1.09          | 1.09            |
| C14-H31                     |              |               |               | 1.09          | 1.09            |
| C15-H32                     |              |               |               |               | 1.09            |
| C15-H33                     |              |               |               |               | 1.09            |
| C16-H34                     |              |               |               |               | 1.09            |
| C16-H35                     |              |               |               |               | 1.09            |
| C16-H36                     |              |               |               |               | 1.09            |
| <b>Cl20-H9</b>              | <b>1.99</b>  | <b>2.00</b>   | <b>2.02</b>   | <b>2.02</b>   | <b>2.02</b>     |
| <b>Dihedral Angle (deg)</b> |              |               |               |               |                 |
| $\angle$ N1-C7-C8-C9        |              | <b>-64.52</b> | <b>-64.54</b> | <b>-64.62</b> | <b>-64.73</b>   |

**Table S2.** Wavenumbers of vibrational modes for  $C_2mim^+$  and the energetically optimized configuration of  $C_nmim$  Cl ( $n = 2, 4, 6, 8, 10$ ), calculated using DFT and observed in the IR spectra.

| Vibration                                            | Computational                  |                                       | Experimental |
|------------------------------------------------------|--------------------------------|---------------------------------------|--------------|
|                                                      | $C_2mim^+$ (cm <sup>-1</sup> ) | IR<br>$C_2mim$ Cl (cm <sup>-1</sup> ) |              |
| $\nu_s$ (C4-H10, C5-H11)                             | 3308 (10)                      | 3279 (6)                              | 3144 (W)     |
| $\nu_{as}$ (C4-H10, C5-H11)                          | 3290 (16)                      |                                       |              |
| $\nu$ (C2-H9)                                        | 3292 (29)                      | 2631 (1420)                           | 3054 (S)     |
| $\nu_{as}$ (H12,13-C6- H14)                          | 3189 (0.3)                     | 3152 (1)                              |              |
| $\nu_{as}$ (H12-C6-H13)                              | 3178 (0.1)                     | 3132 (6)                              |              |
| $\nu_{as}$ (H15-C7-H16, H17,18-C8-H19)               | 3160 (8)                       | 3124 (4)                              | 2976 (M)     |
| $\nu_{as}$ (H15-C7-H16, H17,18-C8-H19)               | 3154 (5)                       | 3115 (8)                              |              |
| $\nu_{as}$ (H15-C7-,H16); $\nu_{as}$ (H17,18-C8-H19) | 3138 (2)                       | 3100 (14)                             |              |
| $\nu_s$ (H15-C7-H16)                                 | 3098 (6)                       | 3055 (33)                             | 2931 (W)     |
| $\nu_s$ (H12,13-C6-H14)                              | 3085 (4)                       | 3046 (22)                             |              |
| $\nu_s$ (H17-C8-H18,19)                              | 3063 (4)                       | 3020 (24)                             | 2868 (W)     |

The C–H region for  $C_2mim$  Cl is scaled by 0.991. The IR intensities are shown in km/mol in parentheses. Key: W, weak; M, medium; S, strong;  $\nu$ , stretch;  $\nu_s$ , symmetric stretch;  $\nu_{as}$ , asymmetric stretch.

| Vibration                                                                         | Computational                  |                                       | Experimental |
|-----------------------------------------------------------------------------------|--------------------------------|---------------------------------------|--------------|
|                                                                                   | $C_4mim^+$ (cm <sup>-1</sup> ) | IR<br>$C_4mim$ Cl (cm <sup>-1</sup> ) |              |
| $\nu_s$ (C4-H10, C5-H11)                                                          | 3310 (10)                      | 3134 (6)                              | 3143 (W)     |
| $\nu_{as}$ (C4-H10, C5-H11)                                                       | 3291 (19)                      |                                       |              |
| $\nu$ (C2-H9)                                                                     | 3292 (23)                      | 2555 (1239)                           | 3057 (M)     |
| $\nu_{as}$ (H12,13-C6- H14)                                                       | 3177 (0.1)                     | 2988 (7)                              |              |
| $\nu_{as}$ (H12-C6-H13)                                                           | 3178 (0.1)                     | 2971 (19)                             |              |
| $\nu_{as}$ (H21-22-C10-H12); $\nu_{as}$ (H19-C9-H20)                              | 3140 (16)                      | 2958 (14)                             | 2957 (S)     |
| $\nu_{as}$ (H15-C7-H16, H17-C8-H18)                                               | 3160 (8)                       | 2950 (11)                             |              |
| $\nu_s$ (H19-C9-H20)                                                              | 3125 (33)                      | 2944 (43)                             | 2930 (M)     |
| $\nu_{as}$ (H17-C8-H18), $\nu_{as}$ (H21,22-C10-,H23);<br>$\nu_{as}$ (H19-C9-H20) |                                | 2929 (18)                             |              |
| $\nu_s$ (H15-C7-H16); $\nu_{as}$ (H17-C8-H18);<br>$\nu_{as}$ (H19-C9-H20);        | 3102 (19)                      | 2908 (9)                              |              |
| $\nu_{as}$ (H21,22-C10-,H23)                                                      |                                |                                       |              |
| $\nu_s$ (H15-C7-H16); $\nu_{as}$ (H17-C8-H18);                                    | 3093 (3.3)                     | 2900 (28)                             |              |
| $\nu_s$ (H17-C8-H18);                                                             |                                | 2884 (11)                             |              |
| $\nu_s$ (H12,13-C6-H14)                                                           | 3085 (4)                       | 2879 (65)                             |              |
| $\nu_s$ (H21-C10-H22,23)                                                          | 3051 (22)                      | 2870 (42)                             | 2867 (M)     |
| $\nu_s$ (H17-C8-H18)                                                              | 3046 (14)                      | 2858 (45)                             |              |
| $\nu_s$ (H19-C9-H20)                                                              | 3030 (20)                      |                                       |              |

The C–H region for  $C_4mim$  Cl is scaled by 0.954. The IR intensities are shown in km/mol in parentheses. Key: W, weak; M, medium; S, strong;  $\nu$ , stretch;  $\nu_s$ , symmetric stretch;  $\nu_{as}$ , asymmetric stretch.

| Vibration                                                                                           | Computational                  |                                       | Experimental |
|-----------------------------------------------------------------------------------------------------|--------------------------------|---------------------------------------|--------------|
|                                                                                                     | $C_6mim^+$ (cm <sup>-1</sup> ) | IR<br>$C_6mim$ Cl (cm <sup>-1</sup> ) |              |
| $\nu_s$ (C4-H10, C5-H11)                                                                            | 3310 (10)                      | 3054 (2)                              | 3140 (W)     |
| $\nu_{as}$ (C4-H10, C5-H11)                                                                         | 3292 (17)                      | 3036 (6)                              |              |
| $\nu$ (C2-H9)                                                                                       | 3291 (25)                      | 2526 (1128)                           | 3052 (M)     |
| $\nu_{as}$ (H12,13-C6- H14)                                                                         | 3189 (0.4)                     | 2919 (7)                              |              |
| $\nu_{as}$ (H25-C12-H26,27); $\nu_{as}$ (H23-C11-H24)                                               | 3178 (0.2)                     | 2900 (21)                             | 2955 (M)     |
| $\nu_{as}$ (H15-C7-H16, H17-C8-H18)                                                                 | 3151 (4.2)                     | 2880 (16)                             |              |
| $\nu_{as}$ (H25-C12-H26)                                                                            | 3130 (25)                      | 2879 (37)                             |              |
| $\nu_s$ (H23-C11-H24), $\nu_s$ (H21-C10-H22)                                                        | 3118 (48)                      | 2869 (61)                             | 2929 (S)     |
| $\nu_s$ (H15-C7-H16); $\nu_{as}$ (H17-C8-H18);<br>$\nu_{as}$ (H19-C9-H20), $\nu_{as}$ (H21-C10-H22) | 3103 (30)                      |                                       |              |
| $\nu_{as}$ (H17-C8-H18); $\nu_{as}$ (H19-C9-H20),                                                   |                                | 2860 (34)                             |              |

|                                                                                                                                                            |           |          |           |
|------------------------------------------------------------------------------------------------------------------------------------------------------------|-----------|----------|-----------|
| $\nu_{as}$ (H21-C10-H22)                                                                                                                                   |           |          |           |
| $\nu_{as}$ (H17-C8-H18); $\nu_{as}$ (H19-C9-H20),<br>$\nu_{as}$ (H21-C10-H22); $\nu_{as}$ (H23-C11-H24);<br>$\nu_{as}$ (H25-C12-H26)                       |           | 2849 (6) |           |
| $\nu_s$ (H15-C7-H16); $\nu_{as}$ (H17-C8-H18); $\nu_{as}$ (H19-C9-H20),<br>$\nu_{as}$ (H21-C10-H22); $\nu_{as}$ (H23-C11-H24);<br>$\nu_{as}$ (H25-C12-H26) |           | 2837 (4) |           |
| $\nu_s$ (H15-C7-H16)                                                                                                                                       | 3093 (7)  |          | 2831 (28) |
| $\nu_{as}$ (H23-C11-H24), $\nu_{as}$ (H21-C10-H22)                                                                                                         | 3083 (36) |          | 2830 (10) |
| $\nu_s$ (H18-C8-H19)                                                                                                                                       | 3046 (17) |          | 2815 (11) |
| $\nu_s$ (H12,13-C6-H14)                                                                                                                                    | 3085 (4)  |          | 2810 (75) |
| $\nu_s$ (H25-C12-H26)                                                                                                                                      | 3045 (24) |          | 2802 (41) |
| $\nu_s$ (H23-C11-H24); $\nu_s$ (H19-C9-H20)                                                                                                                | 3034 (60) |          | 2788 (77) |

The C–H region for C<sub>6</sub>mim Cl is scaled by 0.923. The IR intensities are shown in km/mol in parentheses. Key: W, weak; M, medium; S, strong;  $\nu$ , stretch;  $\nu_s$ , symmetric stretch;  $\nu_{as}$ , asymmetric stretch.

| Vibration                                                                                                                                                                                                               | Computational                                       |                                                 | Experimental |
|-------------------------------------------------------------------------------------------------------------------------------------------------------------------------------------------------------------------------|-----------------------------------------------------|-------------------------------------------------|--------------|
|                                                                                                                                                                                                                         | C <sub>8</sub> mim <sup>+</sup> (cm <sup>-1</sup> ) | IR<br>C <sub>8</sub> mim Cl (cm <sup>-1</sup> ) |              |
| $\nu_s$ (C4-H10, C5-H11)                                                                                                                                                                                                | 3310 (10)                                           | 3180 (2)                                        | 3141 (W)     |
| $\nu_{as}$ (C4-H10, C5-H11)                                                                                                                                                                                             | 3291 (20)                                           | 3160 (6)                                        |              |
| $\nu$ (C2-H9)                                                                                                                                                                                                           | 3292 (21)                                           | 2637 (106)                                      | 3055 (W)     |
| $\nu_{as}$ (H12,13-C6-H14)                                                                                                                                                                                              | 3189 (0.4)                                          | 3038 (7)                                        |              |
| $\nu_{as}$ (H12-C6-H13)                                                                                                                                                                                                 | 3177 (0.2)                                          | 3018 (22)                                       |              |
| $\nu_{as}$ (H15-C7-H16, H17,18-C8-H19)                                                                                                                                                                                  | 3152 (4)                                            | 2997 (16)                                       |              |
| $\nu_{as}$ (H29,30-C14-H31)                                                                                                                                                                                             | 3126 (30)                                           | 2990 (46)                                       |              |
| $\nu_{as}$ (H29,30-C14-H31); $\nu_{as}$ (H27-C13-H28)                                                                                                                                                                   | 3114 (56)                                           | 2986 (69)                                       | 2956 (M)     |
| $\nu_s$ (H15-C7-H16); $\nu_{as}$ (H17-C8-H18);<br>$\nu_{as}$ (H19-C9-H20), $\nu_{as}$ (H21-C10-H22)                                                                                                                     | 3104 (34)                                           |                                                 |              |
| $\nu_{as}$ (H15-C7-H16); $\nu_{as}$ (H17-C8-H18);<br>$\nu_{as}$ (H19-C9-H20), $\nu_{as}$ (H21-C10-H22);<br>$\nu_{as}$ (H23-C11-H24)                                                                                     |                                                     | 2979 (49)                                       |              |
| $\nu_{as}$ (H15-C7-H16); $\nu_{as}$ (H17-C8-H18);<br>$\nu_{as}$ (H19-C9-H20), $\nu_{as}$ (H21-C10-H22);<br>$\nu_{as}$ (H23-C11-H24); $\nu_{as}$ (H25-C12-H26);<br>$\nu_{as}$ (H27-C13-H28); $\nu_{as}$ (H29,30-C14-H31) | 3086 (80)                                           | 2970 (16)                                       |              |
| $\nu_s$ (H15-C7-H16); $\nu_{as}$ (H17-C8-H18);<br>$\nu_{as}$ (H19-C9-H20), $\nu_{as}$ (H21-C10-H22);<br>$\nu_{as}$ (H23-C11-H24); $\nu_{as}$ (H25-C12-H26);<br>$\nu_{as}$ (H27-C13-H28); $\nu_{as}$ (H29,30-C14-H31)    |                                                     | 2958 (20)                                       |              |
| $\nu_s$ (H15-C7-H16, H17-C8-H18)                                                                                                                                                                                        |                                                     | 2948 (28)                                       |              |
| $\nu_{as}$ (H23-C11-H24); $\nu_{as}$ (H27-C13-H28)                                                                                                                                                                      |                                                     | 2941 (2)                                        |              |
| $\nu_s$ (H17-C8-H18); $\nu_{as}$ (H23-C11-H24);<br>$\nu_{as}$ (H25-C12-H26); $\nu_{as}$ (H27-C13-H28)                                                                                                                   |                                                     | 2932 (19)                                       |              |
| $\nu_s$ (H17-C7-H18)                                                                                                                                                                                                    |                                                     | 2931 (5)                                        |              |
| $\nu_s$ (H17-C8-H18)                                                                                                                                                                                                    | 3084 (4)                                            | 2924 (80)                                       | 2924 (S)     |
| $\nu_s$ (H29,30-C14-H31)                                                                                                                                                                                                | 3042 (33)                                           | 2915 (39)                                       | 2853 (M)     |
| $\nu_s$ (H17-C8-H18); $\nu_s$ (H23-C11-H24);<br>$\nu_s$ (H25-C12-H26); $\nu_s$ (H27-C13-H28)                                                                                                                            | 3034 (101)                                          |                                                 |              |
| $\nu_s$ (H27-C13-H28)                                                                                                                                                                                                   |                                                     | 2909 (60)                                       |              |
| $\nu_{as}$ (H17-C8-H18)                                                                                                                                                                                                 |                                                     | 2900 (44)                                       |              |
| $\nu_s$ (H21-C10-H22); $\nu_{as}$ (H23-C11-H24);<br>$\nu_s$ (H25-C12-H26); $\nu_s$ (H27-C13-H28)                                                                                                                        |                                                     | 2899 (57)                                       |              |
| $\nu_s$ (H21-C10-H22); $\nu_s$ (H25-C12-H26)                                                                                                                                                                            |                                                     | 2896 (0.4)                                      |              |
| $\nu_s$ (H23-C11-H24)                                                                                                                                                                                                   |                                                     | 2892 (15)                                       |              |

The C–H region for C<sub>8</sub>mim Cl is scaled by 0.960. The IR intensities are shown in km/mol in parentheses. Key: W, weak; M, medium; S, strong;  $\nu$ , stretch;  $\nu_s$ , symmetric stretch;  $\nu_{as}$ , asymmetric stretch.

| Vibration | Computational | Experimental |
|-----------|---------------|--------------|
|-----------|---------------|--------------|



|                                                                                                                                                                                                                                                                               | $C_{10}mim^+$ (cm <sup>-1</sup> ) | IR<br>$C_{10}mim$ Cl<br>(cm <sup>-1</sup> ) |          |
|-------------------------------------------------------------------------------------------------------------------------------------------------------------------------------------------------------------------------------------------------------------------------------|-----------------------------------|---------------------------------------------|----------|
| $\nu_s$ (C4-H10, C5-H11)                                                                                                                                                                                                                                                      | 3311 (10)                         | 3180 (2)                                    | 3141 (W) |
| $\nu_{as}$ (C4-H10, C5-H11)                                                                                                                                                                                                                                                   | 32901(19)                         | 3161 (6)                                    |          |
| $\nu$ (C2-H9)                                                                                                                                                                                                                                                                 | 3292 (22)                         | 2640 (1104)                                 | 3057 (W) |
| $\nu_{as}$ (H12,13-C6- H14)                                                                                                                                                                                                                                                   | 3189 (0.4)                        | 3039 (7)                                    |          |
| $\nu_{as}$ (H12-C6-H13)                                                                                                                                                                                                                                                       | 3178 (0.2)                        | 3018 (22)                                   |          |
| $\nu_{as}$ (H15-C7-H16, H17-C8-H18)                                                                                                                                                                                                                                           | 3152 (4)                          | 2998 (15)                                   |          |
| $\nu_{as}$ (H33,34-C16- H35)                                                                                                                                                                                                                                                  | 3123 (34)                         | 2992 (45)                                   |          |
| $\nu_{as}$ (H33,34-C16- H35); $\nu_{as}$ (H31-C15- H32)                                                                                                                                                                                                                       | 3113 (60)                         | 2987 (70)                                   | 2955 (W) |
| $\nu_{as}$ (H15-C7-H16); $\nu_{as}$ (H17-C8-H18); $\nu_{as}$ (H19-C9-H20);<br>$\nu_{as}$ (H21-C10-H22); $\nu_{as}$ (H23-C11-H24)                                                                                                                                              |                                   | 2980 (57)                                   |          |
| $\nu_s$ (H15-C7-H16); $\nu_{as}$ (H17-C8-H18); $\nu_{as}$ (H19-C9-H20);<br>$\nu_{as}$ (H21-C10-H22); $\nu_{as}$ (H23-C11-H24);<br>$\nu_{as}$ (H25-C12-H26); $\nu_{as}$ (H27-C13-H28);<br>$\nu_{as}$ (H29-C14-H30)                                                             | 3103 (37)                         | 2971 (26)                                   |          |
| $\nu_s$ (H15-C7-H16); $\nu_{as}$ (H17-C8-H18); $\nu_{as}$ (H19-C9-H20);<br>$\nu_{as}$ (H21-C10-H22); $\nu_{as}$ (H23-C11-H24);<br>$\nu_{as}$ (H25-C12-H26); $\nu_{as}$ (H27-C13-H28);<br>$\nu_{as}$ (H29-C14-H30); $\nu_{as}$ (H33,34-C16- H35);<br>$\nu_{as}$ (H31-C15- H32) | 3087 (126)                        | 2962 (72)                                   |          |
| $\nu_s$ (H15-C7-,H16); $\nu_{as}$ (H17,18-C8-H19)                                                                                                                                                                                                                             |                                   | 2948 (28)                                   |          |
| $\nu_{as}$ (H19-C9-H20); $\nu_{as}$ (H21-C10-H22);<br>$\nu_{as}$ (H23-C11-H24); $\nu_{as}$ (H25-C12-H26);<br>$\nu_s$ (H27-C13-H28); $\nu_s$ (H29-C14-H30)                                                                                                                     | 3034 (150)                        | 2924 (80)                                   | 2922 (S) |
| $\nu_s$ (H33,34-C16- H35)                                                                                                                                                                                                                                                     |                                   | 2917 (39)                                   |          |
| $\nu_s$ (H31-C15- H32)                                                                                                                                                                                                                                                        |                                   | 2912 (78)                                   | 2852 (M) |
| $\nu_s$ (H19-C9-H20); $\nu_s$ (H21-C10-H22);<br>$\nu_s$ (H23-C11-H24); $\nu_s$ (H25-C12-H26);<br>$\nu_s$ (H27-C13-H28); $\nu_s$ (H29-C14-H30)                                                                                                                                 | 3034 (150)                        | 2904 (83)                                   |          |
| $\nu_s$ (H19-C9-H20)                                                                                                                                                                                                                                                          | 3016 (4)                          | 2902 (40)                                   |          |

The C–H region for  $C_{10}mim$  Cl is scaled by 0.961. The IR intensities are shown in km/mol in parentheses. Key: W, weak; M, medium; S, strong;  $\nu$ , stretch;  $\nu_s$ , symmetric stretch;  $\nu_{as}$ , asymmetric stretch.

**Table S3.** Natural bond orbital (NBO) electron density in the cation and four configurations of  $C_n$ mim Cl ( $n=2,4,6,8$ , and 10), calculated at the wB97XD/6-311++G(d,p) level of theory.

|            | $C_2mim$     | $C_2mim$ Cl  | $C_4mim$     | $C_4mim$ Cl  | $C_6mim$     | $C_6mim$ Cl  | $C_8mim$     | $C_8mim$ Cl  | $C_{10}mim$  | $C_{10}mim$ Cl |
|------------|--------------|--------------|--------------|--------------|--------------|--------------|--------------|--------------|--------------|----------------|
| N1         | -0.34        | -0.37        | -0.34        | -0.36        | -0.34        | -0.36        | -0.34        | -0.36        | -0.34        | -0.36          |
| <b>C2</b>  | <b>0.30</b>  | <b>0.28</b>  | <b>0.29</b>  | <b>0.27</b>  | <b>0.29</b>  | <b>0.27</b>  | <b>0.29</b>  | <b>0.27</b>  | <b>0.29</b>  | <b>0.27</b>    |
| <b>H9</b>  | <b>0.24</b>  | <b>0.29</b>  | <b>0.24</b>  | <b>0.29</b>  | <b>0.24</b>  | <b>0.29</b>  | <b>0.24</b>  | <b>0.29</b>  | <b>0.29</b>  | <b>0.29</b>    |
| N3         | -0.34        | -0.36        | -0.34        | -0.37        | -0.34        | -0.36        | -0.34        | -0.36        | -0.36        | -0.36          |
| C4         | -0.01        | -0.02        | -0.00        | -0.03        | -0.00        | -0.03        | -0.00        | -0.03        | -0.00        | -0.03          |
| H10        | 0.25         | 0.23         | 0.25         | 0.23         | 0.25         | 0.23         | 0.25         | 0.23         | 0.25         | 0.23           |
| C5         | -0.01        | -0.04        | -0.01        | -0.03        | -0.01        | -0.03        | -0.01        | -0.03        | -0.01        | -0.03          |
| H11        | 0.25         | 0.23         | 0.25         | 0.23         | 0.25         | 0.23         | 0.25         | 0.23         | 0.25         | 0.23           |
| <b>C6</b>  | <b>-0.36</b> | <b>-0.35</b> | <b>-0.36</b> | <b>-0.37</b> | <b>-0.36</b> | <b>-0.37</b> | <b>-0.36</b> | <b>-0.37</b> | <b>-0.36</b> | <b>-0.37</b>   |
| <b>H12</b> | <b>0.23</b>  | <b>0.21</b>  | <b>0.23</b>  | <b>0.20</b>  | <b>0.23</b>  | <b>0.20</b>  | <b>0.23</b>  | <b>0.20</b>  | <b>0.23</b>  | <b>0.20</b>    |
| H13        | 0.23         | 0.21         | 0.23         | 0.20         | 0.23         | 0.20         | 0.23         | 0.20         | 0.23         | 0.20           |
| H14        | 0.22         | 0.24         | 0.22         | 0.27         | 0.22         | 0.27         | 0.22         | 0.27         | 0.22         | 0.27           |
| <b>C7</b>  | <b>-0.17</b> | <b>-0.18</b> | <b>-0.17</b> | <b>-0.15</b> | <b>-0.16</b> | <b>-0.15</b> | <b>-0.16</b> | <b>-0.16</b> | <b>-0.16</b> | <b>-0.15</b>   |
| <b>H15</b> | <b>0.21</b>  | <b>0.26</b>  | <b>0.22</b>  | <b>0.20</b>  | <b>0.22</b>  | <b>0.21</b>  | <b>0.22</b>  | <b>0.20</b>  | <b>0.22</b>  | <b>0.20</b>    |
| H16        | 0.22         | 0.19         | 0.22         | 0.21         | 0.22         | 0.20         | 0.22         | 0.20         | 0.22         | 0.20           |
| C8         | -0.59        | -0.59        | -0.40        | -0.42        | -0.39        | -0.41        | -0.39        | -0.41        | -0.39        | -0.41          |
| H17        | 0.21         | 0.24         | 0.20         | 0.24         | 0.20         | 0.21         | 0.20         | 0.21         | 0.20         | 0.21           |

|             |      |              |       |              |       |              |       |              |       |              |
|-------------|------|--------------|-------|--------------|-------|--------------|-------|--------------|-------|--------------|
| H18         | 0.21 | 0.19         | 0.22  | 0.21         | 0.22  | 0.23         | 0.22  | 0.23         | 0.22  | 0.23         |
| H19         | 0.23 | 0.21         | 0.18  | 0.18         | 0.19  | 0.18         | 0.18  | 0.18         | 0.18  | 0.18         |
| C9          |      |              | -0.39 | -0.39        | -0.39 | -0.38        | -0.39 | -0.39        | -0.39 | -0.38        |
| H20         |      |              | 0.18  | 0.20         | 0.18  | 0.20         | 0.18  | 0.20         | 0.19  | 0.20         |
| C10         |      |              | -0.27 | -0.58        | -0.38 | -0.39        | -0.38 | -0.39        | -0.38 | -0.39        |
| H21         |      |              | 0.20  | 0.18         | 0.19  | 0.17         | 0.20  | 0.17         | 0.20  | 0.17         |
| H22         |      |              | 0.21  | 0.24         | 0.19  | 0.23         | 0.19  | 0.23         | 0.19  | 0.23         |
| C11         |      |              |       |              | -0.38 | -0.38        | -0.38 | -0.38        | -0.37 | -0.37        |
| H23         |      |              | 0.21  | 0.20         | 0.18  | 0.17         | 0.19  | 0.17         | 0.19  | 0.17         |
| H24         |      |              |       |              | 0.19  | 0.20         | 0.20  | 0.20         | 0.19  | 0.20         |
| H25         |      |              |       |              | 0.19  | 0.19         | 0.19  | 0.18         | 0.18  | 0.18         |
| C12         |      |              |       |              | -0.57 | -0.57        | -0.38 | -0.38        | -0.38 | -0.37        |
| H26         |      |              |       |              | 0.20  | 0.18         | 0.18  | 0.20         | 0.18  | 0.20         |
| H27         |      |              |       |              | 0.21  | 0.20         | 0.19  | 0.18         | 0.19  | 0.19         |
| C13         |      |              |       |              |       |              | -0.38 | -0.38        | -0.37 | -0.37        |
| H28         |      |              |       |              |       |              | 0.19  | 0.19         | 0.18  | 0.19         |
| H29         |      |              |       |              |       |              | 0.19  | 0.19         | 0.20  | 0.19         |
| C14         |      |              |       |              |       |              | -0.57 | -0.57        | -0.38 | -0.38        |
| H30         |      |              |       |              |       |              | 0.19  | 0.19         | 0.19  | 0.18         |
| H31         |      |              |       |              |       |              | 0.19  | 0.19         | 0.19  | 0.19         |
| C15         |      |              |       |              |       |              |       |              | -0.38 | -0.38        |
| H32         |      |              |       |              |       |              |       |              | 0.18  | 0.18         |
| H33         |      |              |       |              |       |              |       |              | 0.19  | 0.18         |
| C16         |      |              |       |              |       |              |       |              | 0.18  | 0.19         |
| H34         |      |              |       |              |       |              |       |              | -0.57 | -0.57        |
| H35         |      |              |       |              |       |              |       |              | 0.19  | 0.19         |
| <b>CI38</b> |      | <b>-0.86</b> |       | <b>-0.86</b> |       | <b>-0.86</b> |       | <b>-0.86</b> |       | <b>-0.86</b> |
